# Supplementary material
Source: PubMed Central journal article supplement (PMC7196638)
Supplement: supp_RA119.011495_156492_2_supp_489457_q69tqt.pdf [file supp_RA119.011495_156492_2_supp_489457_q69tqt.pdf]

**Table S1. Oligonucleotide sequences**

| <b><u>Oligonucleotides for qPCR</u></b>                                   |                                                                                                  |                                                                                                 |
|---------------------------------------------------------------------------|--------------------------------------------------------------------------------------------------|-------------------------------------------------------------------------------------------------|
| <b><u>Gene</u></b>                                                        | <b><u>Forward Primer</u></b>                                                                     | <b><u>Reverse Primer</u></b>                                                                    |
| $\beta$ actin                                                             | CTG AAC CCT AAG GCC AAC CGT G                                                                    | CCG TCT CCG GAG TCC ATC ACA ATG                                                                 |
| 18S rRNA                                                                  | GCG GGT AAC CCG TTG AAC CCC ATT                                                                  | CCA TCC AAT CGG TAG TAG CGA CGG                                                                 |
| MyD88-L                                                                   | CCACCCTTGATGACCCCCTAGGACAAAC                                                                     | GTCTGTTCTAGTTGCCGGATCATCTCCTGCAC                                                                |
| MyD88-S                                                                   | GGAGCTGAAGTCGCGCATCGGACAAAC                                                                      | GTCTGTTCTAGTTGCCGGATCATCTCCTGCAC                                                                |
| TNF $\alpha$                                                              | GAT CGG TCC CCA AAG GGA TGA GAA<br>GTT CCC                                                       | CAG GCT TGT CAC TCG AAT TTT GAG AAG<br>ATG ATC                                                  |
| MyD88-L-<br>minigene                                                      | CCA CCC TTG ATG ACC CCC TAG GAC<br>AAA C                                                         | ATC TCC TGC ACA AAC TCG GAG GAT CC                                                              |
| MyD88-S-<br>minigene                                                      | GGA GCT GAA GTC GCG CAT CGG ACA<br>AAC                                                           | ATC TCC TGC ACA AAC TCG GAG GAT CC                                                              |
| <b><u>Oligonucleotides for RT-PCR analysis of MyD88-L and MyD88-S</u></b> |                                                                                                  |                                                                                                 |
|                                                                           | TTG TTG GAT GCC TGG CAG GGG CGC<br>TCT GGC                                                       | CAC GGT CGG ACA CAC ACA ACT TAA GCC<br>GAT AGT C                                                |
| <b><u>Oligonucleotides for MyD88 mini-gene construction</u></b>           |                                                                                                  |                                                                                                 |
| MyD88-<br>Outer                                                           | GGC TGG CAG GAG ACT TAA GGG AAG                                                                  | TTC ACC CAC CTA CCC TCT TAG ATG TTT<br>AAC CAA C                                                |
| MyD88-<br>Inner                                                           | AAT TCT CGA GGA ATT CAT GTC TGC<br>GGG AGA CCC CCG C                                             | AAT TGC GGC CGC CTT TTC TCA ATT AGC<br>TCG CTG GCA ATG GAC CAG ACA CAG                          |
| MyD88-<br>mut (exon<br>3)                                                 | GAA CTT TTC GAT GCC TTT ATC TGC<br>TAC TGC CCA GGA TCC TCC GAG TTT<br>GTG CAG GAG ATG ATC CGG C' | GCC GGA TCA TCT CCT GCA CAA ACT CGG<br>AGG ATC CTG GGC AGT AGC AGA TAA AGG<br>CAT CGA AAA GTT C |
| MyD88-<br>mut2<br>(intron 1)                                              | GGA TGG GGT GGG AGG AGG AGT ACT<br>AAC ACT TTT TTT TTT TCC ACA GAG<br>GAG GAC TGC CAG            | CTG GCA GTC CTC CTC TGT GGA AAA AAA<br>AAA AGT GTT AGT ACT CCT CCT CCC ACC<br>CCA TCC           |
